# Supplementary material
Source: PubMed Central journal article supplement (PMC3095851)
Supplement: NIHMS285005-supplement-01.pdf [file NIHMS285005-supplement-01.pdf]

## Destabilization and recovery of a yeast prion after mild heat shock

Gary P. Newnam, Jennifer L. Birchmore and Yury O. Chernoff

### *Supplementary Data*

#### **Figure S1. Viability of various yeast cultures at mild heat shock.**

A – There is no decrease in viability of the cells from exponential [*psi*<sup>-</sup>] culture at 39°C. The strain OT60 was pre-grown at 25°C. Aliquots were taken before (0) and after specified periods of time at 39°C. Serial decimal dilutions were prepared, and 3 µl of undiluted culture (0) and each dilution were spotted onto YPD medium. Plates were photographed after 6 days at 30°C. B – There is a decrease in viability of the cells from exponential [*PSI*<sup>+</sup>] culture at 43°C. The strain OT55 was pre-grown at 25°C. Experiment was performed as described above, except that heat shock was at 43°C. Plates were photographed after 4 days at 30°C. C - There is no decrease in viability of the cells from stationary [*PSI*<sup>+</sup>] culture at 39°C. Stationary culture was prepared at 25°C as described in Material and methods. Experiment was performed as described above in panel A, except that undiluted culture was not spotted. Plate was photographed after 4 days at 30°C. D – Addition of cycloheximide does not affect viability of the exponential [*PSI*<sup>+</sup>] culture at 39°C. The strain OT55 was pre-grown at 25°C. Experiment was performed as in panel A, except that cycloheximide was added up to the final concentration of 100 µg/µl at the beginning of the experiment, and cells were washed three times with sterile water and resuspended in water before spotting. Plates were photographed after 5 days at 30°C. E – The *ssa* deletions do not affect viability of the exponential [*PSI*<sup>+</sup>] culture at 39°C. The control strain OT55 (WT) and isogenic *ssa* deletion strains were pre-grown at 25°C, and experiment was performed as described on panel A. Plates were photographed after 4 days at 30°C.

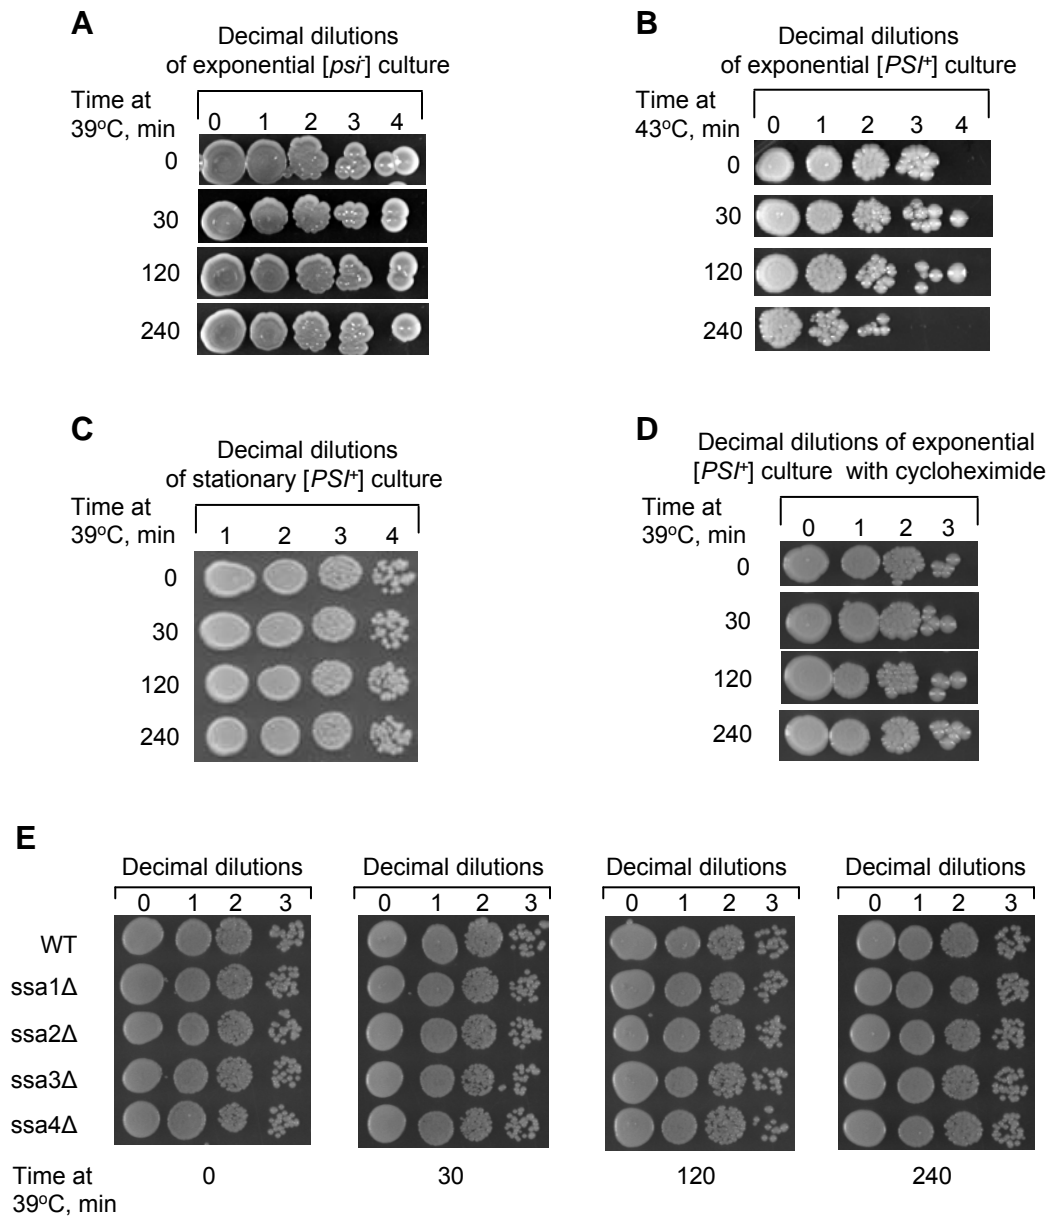

Newnam *et al.*, Figure S1
